# Supplementary material
Source: publisher site journal article supplement (https://www.dovepress.com/article/206949)
Supplement: Supplementary file 1 [file get_supplementary_file.php]

# Appendix

**Supplemental Table S1** PRISMA checklist

| **Section/topic** | **#** | **Checklist item** | **Reported on page #** |
| --- | --- | --- | --- |
| **TITLE** | | |  |
| Title | 1 | Identify the report as a systematic review, meta-analysis, or both. | 1 |
| **ABSTRACT** | | |  |
| Structured summary | 2 | Provide a structured summary including, as applicable: background; objectives; data sources; study eligibility criteria, participants, and interventions; study appraisal and synthesis methods; results; limitations; conclusions and implications of key findings; systematic review registration number. | 3, unstructured |
| **INTRODUCTION** | | |  |
| Rationale | 3 | Describe the rationale for the review in the context of what is already known. | 4 |
| Objectives | 4 | Provide an explicit statement of questions being addressed with reference to participants, interventions, comparisons, outcomes, and study design (PICOS). | 5 |
| **METHODS** | | |  |
| Protocol and registration | 5 | Indicate if a review protocol exists, if and where it can be accessed (e.g., Web address), and, if available, provide registration information including registration number. | N.A. |
| Eligibility criteria | 6 | Specify study characteristics (e.g., PICOS, length of follow-up) and report characteristics (e.g., years considered, language, publication status) used as criteria for eligibility, giving rationale. | 5-6 |
| Information sources | 7 | Describe all information sources (e.g., databases with dates of coverage, contact with study authors to identify additional studies) in the search and date last searched. | 5-6 and Appendix 1 |
| Search | 8 | Present full electronic search strategy for at least one database, including any limits used, such that it could be repeated. | Appendix 1 |
| Study selection | 9 | State the process for selecting studies (i.e., screening, eligibility, included in systematic review, and, if applicable, included in the meta-analysis). | 5-6, Figure 1, and Appendix 1 |
| Data collection process | 10 | Describe method of data extraction from reports (e.g., piloted forms, independently, in duplicate) and any processes for obtaining and confirming data from investigators. | 5-6, Figure 1, and Appendix 1 |
| Data items | 11 | List and define all variables for which data were sought (e.g., PICOS, funding sources) and any assumptions and simplifications made. | 5-6, Figure 1, and Appendix 1 |
| Risk of bias in individual studies | 12 | Describe methods used for assessing risk of bias of individual studies (including specification of whether this was done at the study or outcome level), and how this information is to be used in any data synthesis. | 6-7, Figure 2 |
| Summary measures | 13 | State the principal summary measures (e.g., risk ratio, difference in means). | 5-6 |
| Synthesis of results | 14 | Describe the methods of handling data and combining results of studies, if done, including measures of consistency (e.g., I2) for each meta-analysis. | 5 |
| Risk of bias across studies | 15 | Specify any assessment of risk of bias that may affect the cumulative evidence (e.g., publication bias, selective reporting within studies). | 6-7, Figure 2 |
| Additional analyses | 16 | Describe methods of additional analyses (e.g., sensitivity or subgroup analyses, meta-regression), if done, indicating which were pre-specified. | N.A. |
| **RESULTS** | | |  |
| Study selection | 17 | Give numbers of studies screened, assessed for eligibility, and included in the review, with reasons for exclusions at each stage, ideally with a flow diagram. | 6 |
| Study characteristics | 18 | For each study, present characteristics for which data were extracted (e.g., study size, PICOS, follow-up period) and provide the citations. | 7-9 |
| Risk of bias within studies | 19 | Present data on risk of bias of each study and, if available, any outcome level assessment (see item 12). | 6-7 |
| Results of individual studies | 20 | For all outcomes considered (benefits or harms), present, for each study: (a) simple summary data for each intervention group (b) effect estimates and confidence intervals, ideally with a forest plot. | N.A. |
| Synthesis of results | 21 | Present results of each meta-analysis done, including confidence intervals and measures of consistency. | N.A. |
| Risk of bias across studies | 22 | Present results of any assessment of risk of bias across studies (see Item 15). | 6-7, Figure 2 |
| Additional analysis | 23 | Give results of additional analyses, if done (e.g., sensitivity or subgroup analyses, meta-regression [see Item 16]). | N.A. |
| **DISCUSSION** | | |  |
| Summary of evidence | 24 | Summarize the main findings including the strength of evidence for each main outcome; consider their relevance to key groups (e.g., healthcare providers, users, and policy makers). | 9-12 |
| Limitations | 25 | Discuss limitations at study and outcome level (e.g., risk of bias), and at review-level (e.g., incomplete retrieval of identified research, reporting bias). | 12-13 |
| Conclusions | 26 | Provide a general interpretation of the results in the context of other evidence, and implications for future research. | 13 |
| **FUNDING** | | |  |
| Funding | 27 | Describe sources of funding for the systematic review and other support (e.g., supply of data); role of funders for the systematic review. | 14 |
| *From:*  Moher D, Liberati A, Tetzlaff J, Altman DG, The PRISMA Group (2009). Preferred Reporting Items for Systematic Reviews and Meta-Analyses: The PRISMA Statement. PLoS Med 6(7): e1000097. doi:10.1371/journal.pmed1000097 | | | |

# Appendix 1: SEARCH STRATEGIES

***Embase (Ovid): 1974 to 2017 November 30***

***Date searched: 1.12.17***

1 exp breast tumor/ (463769)

2 (breast$ adj5 (neoplas$ or cancer$ or tumo?r$ or metasta$ or carcinoma$ or adenocarcinoma$ or sarcoma$ or dcis or ductal or infiltrat$ or intraductal$ or lobular or medullary)).ti,ab,ot,hw. (531644)

3 (mammar$ adj5 (neoplas$ or cancer$ or tumo?r$ or metasta$ or carcinoma$ or adenocarcinoma$ or sarcoma$ or dcis or ductal or infiltrat$ or intraductal$ or lobular or medullary)).ti,ab,ot,hw. (40034)

4 or/1-3 (545595)

5 BRCA1 protein/ (14048)

6 BRCA2 protein/ (10148)

7 (BRCA or gBRCA or BRCA1 or BRCA2 or BRCAI or BRCAII or BRCC or BRCC1 or BRCCI or BRCC2 or BRCCII or BROVCA or BROVCA1 or BROVCAI or BROVCA2 or BROVCAII or "BR/OVCA" or "BR/OVCA1" or "BR/OVCAI" or "BR/OVCA2" or "BR/OVCAII" or "BRCA1/2").ti,ab,ot,hw. (29506)

8 (Familial or "family history" or heredit$ or inherit$ or predispo$ or susceptib$).ti,ab,ot,hw. (1259663)

9 exp genetic predisposition to disease/ (121699)

10 Gene mutation/ (363425)

11 (genetic or gene or genes).ti,ab,ot,hw. (3724768)

12 5 or 6 or 7 or 8 or 9 or 10 or 11 (4410577)

13 4 and 12 (144186)

14 Productivity/ (34157)

15 Absenteeism/ (16091)

16 Caregiver Burden/ (5886)

17 Caregiver/ (61150)

18 Work Disability/ (4643)

19 ((human$ or social$ or societ$ or work$ or employe$ or business$ or communit$ or famil$ or carer$ or caregiver$) adj3 (burden$ or consequenc$ or impact$ or problem$ or productivity or sickness or impairment$)).ti,ab,ot,hw. (139384)

20 ((long standing or longstanding or long term or longterm or permanent or employee$) adj2 (absence$ or absent$ or ill$ or sick$ or disab$)).ti,ab,ot,hw. (12347)

21 (llsi or ((emergenc$ or domestic$ or famil$ or carer$ or caregiver$) adj3 leave$)).ti,ab,ot. (880)

22 (burden adj2 (illness$ or disease$ or sickness$)).ti,ab,ot,hw. (29249)

23 ((allowance or status or long-term or pension$ or benefit$) adj2 (disab$ or incapacit$)).ti,ab,ot,hw. (20539)

24 ((unable or inability or incapacit$ or incapab$) adj3 work).ti,ab,ot,hw. (2370)

25 ((resource$ or fund$) adj2 (use$ or utili?ation)).ti,ab,ot,hw. (37496)

26 ((health or healthcare) adj2 (resource$ or fund$)).ti,ab,ot,hw. (33007)

27 ("length of stay" or "duration of stay" or "extended stay" or "prolonged stay").ti,ab,ot,hw. (156901)

28 ((ambulatory or ambulance or hospital or A&E or emergency) adj2 (attention$ or trip or trips or visit$ or stay$ or admission$ or admitted or transport$)).ti,ab,ot,hw. (330785)

29 ((GP or general practitioner$ or doctor$ or clinician$ or specialist$ or physician$) adj2 (appointment$ or attention$ or trip or trips or visit$)).ti,ab,ot,hw. (16787)

30 (in-patient stay$ or inpatient stay$).ti,ab,ot,hw. (4217)

31 or/14-30 (774678)

32 health-economics/ (35592)

33 exp economic evaluation/ (269911)

34 exp health care cost/ (259269)

35 exp pharmacoeconomics/ (189712)

36 (econom$ or cost or costs or costly or costing or price or prices or pricing or pharmacoeconomic$).ti,ab. (861626)

37 (expenditure$ not energy).ti,ab. (33390)

38 (value adj2 money).ti,ab. (2017)

39 budget$.ti,ab. (32430)

40 or/32-39 (1201307)

41 ((metabolic adj cost) or (energy adj cost) or (energy adj expenditure)).ti,ab. (30910)

42 40 not 41 (1195454)

43 treatment duration/ (184231)

44 exp drug dose/ (566163)

45 ((treatment$ or therapeutic or therapy or therapies) adj3 (pattern$ or trend$ or utili$ or management or prevalence or initiat$ or duration or distribution$ or discontin$ or coverage or variety or selection or spread or practice or convention)).ti,ab,ot. (335152)

46 ((medication$ or medicating or drug or drugs or prescrip$ or prescrib$) adj3 (pattern$ or trend$ or utili$ or management or prevalence or initiat$ or duration or distribution$ or discontin$ or coverage or variety or selection or spread or practice or convention)).ti,ab,ot. (115019)

47 or/43-45 (984561)

48 incidence/ (295180)

49 standardized incidence ratio/ (2235)

50 Prevalence/ (568914)

51 standardized mortality ratio/ (2172)

52 demography/ (183468)

53 epidemiological data/ (29932)

54 mortality/ (688917)

55 disease progression/ (245423)

56 disease activity/ (70162)

57 morbidity/ (298266)

58 (occurrence$ or incidence$ or prevalence$ or episode$ or mortalit$ or morbidit$ or epidemiolog$ or demograph$).ti,ab,ot. (3441582)

59 or/48-58 (4132025)

60 or/31,42,47,59 (6093169)

61 13 and 60 (32302)

62 animal/ (1820404)

63 animal experiment/ (2184261)

64 (rat or rats or mouse or mice or murine or rodent or rodents or hamster or hamsters or pig or pigs or porcine or rabbit or rabbits or animal or animals or dogs or dog or cats or cow or bovine or sheep or ovine or monkey or monkeys).ti,ab,ot,hw. (6680449)

65 or/62-64 (6680449)

66 exp human/ (19265608)

67 human experiment/ (399595)

68 or/66-67 (19267146)

69 65 not (65 and 68) (5204339)

70 (letter or editorial or note).pt. (2255258)

71 61 not (69 or 70) (29487)

72 limit 71 to yr="2012 -Current" (15079)

73 conference$.pt,st,so. (3594337)

74 72 and 73 (5544)

75 72 not 73 (9535)

***Medline (Ovid): 1946 to November Week 4 2017***

***Date searched: 1.12.17***

1 exp breast neoplasms/ or Carcinoma, Ductal, Breast/ (279375)

2 exp breast/ (44903)

3 exp neoplasms/ (3234699)

4 2 and 3 (26145)

5 (breast$ adj5 (neoplasm$ or cancer$ or tumo?r$ or metasta$ or carcinoma$ or adenocarcinoma$ or sarcoma$ or dcis or ductal or infiltrat$ or intraductal$ or lobular or medullary)).ti,ab,ot,hw. (337194)

6 (mammar$ adj5 (neoplas$ or cancer$ or tumo?r$ or metasta$ or carcinoma$ or adenocarcinoma$ or sarcoma$ or dcis or ductal or infiltrat$ or intraductal$ or lobular or medullary)).ti,ab,ot,hw. (41298)

7 1 or 4 or 5 or 6 (360533)

8 genes, brca1/ or genes, brca2/ (6459)

9 brca1 protein/ or brca2 protein/ (6900)

10 (BRCA or gBRCA or BRCA1 or BRCA2 or BRCAI or BRCAII or BRCC or BRCC1 or BRCCI or BRCC2 or BRCCII or BROVCA or BROVCA1 or BROVCAI or BROVCA2 or BROVCAII or "BR/OVCA" or "BR/OVCA1" or "BR/OVCAI" or "BR/OVCA2" or "BR/OVCAII" or "BRCA1/2").ti,ab,ot,hw. (16712)

11 (Familial or "family history" or heredit$ or inherit$ or predispo$ or susceptib$).ti,ab,ot,hw. (808247)

12 exp Genetic Predisposition to Disease/ (132716)

13 (genetic or gene or genes).ti,ab,ot,hw. (2901259)

14 or/8-13 (3336828)

15 7 and 14 (85498)

16 absenteeism/ (8858)

17 caregivers/ (31396)

18 ((human$ or Social or societ$ or work$ or employe$ or business$ or communit$ or famil$ or carer$ or caregiver$) adj3 (Burden$ or Consequenc$ or impact$ or problem$ or productivity or sickness or impairment$)).ti,ab,ot,hw. (92015)

19 ((long standing or longstanding or long term or longterm or permanent or employee$) adj2 (absence$ or absent$ or ill$ or sick$ or disab$ or diseas$)).ti,ab,ot,hw. (16373)

20 (llsi or ((emergenc$ or domestic$ or famil$ or carer$ or caregiver$) adj3 leave$)).ti,ab,ot,hw. (874)

21 (burden adj2 (illness$ or disease$ or sickness$)).ti,ab,ot,hw. (16901)

22 ((allowance or status or long-term or pension$ or benefit$) adj2 (disab$ or incapacit$)).ti,ab,ot,hw. (10078)

23 ((unable or inability or incapacit$ or incapab$) adj3 work).ti,ab,ot,hw. (1608)

24 ((resource$ or fund$) adj2 (use$ or utilis?ation)).ti,ab,ot,hw. (16817)

25 ("length of stay" or "duration of stay" or "extended stay" or "prolonged stay").ti,ab,ot,hw. (100951)

26 ((health or healthcare) adj2 (resource$ or fund$)).ti,ab,ot,hw. (31992)

27 ((ambulatory or ambulance or hospital or A&E or emergency) adj2 (attention$ or trip or trips or visit$ or stay$ or admission$ or admitted or transport$)).ti,ab,ot,hw. (129020)

28 ((GP or general practitioner$ or doctor$ or clinician$ or specialist$ or physician$) adj2 (appointment$ or attention or trip or trips or visit$)).ti,ab,ot,hw. (10600)

29 (in-patient stay$ or inpatient stay$).ti,ab,ot,hw. (2113)

30 or/16-29 (406872)

31 economics/ (27492)

32 exp "costs and cost analysis"/ (224937)

33 economics, dental/ (1904)

34 exp "economics, hospital"/ (23587)

35 economics, medical/ (9205)

36 economics, nursing/ (4019)

37 economics, pharmaceutical/ (2997)

38 (econom$ or cost or costs or costly or costing or price or prices or pricing or pharmacoeconomic$).ti,ab. (593392)

39 (expenditure$ not energy).ti,ab. (23035)

40 (value adj1 money).ti,ab. (30)

41 budget$.ti,ab. (22086)

42 or/31-41 (733414)

43 ((energy adj cost) or (metabolic adj cost) or (energy adj expenditure)).ti,ab. (24084)

44 42 not 43 (728376)

45 ((treatment$ or therapeutic or therapy or therapies) adj3 (pattern$ or trend$ or utili$ or management or prevalence or initiat$ or duration or distribution$ or discontin$ or coverage or variety or selection or spread or practice or convention)).ti,ab,ot. (204894)

46 ((medication$ or medicating or drug or drugs or prescrip$ or prescrib$) adj3 (pattern$ or trend$ or utili$ or management or prevalence or initiat$ or duration or distribution$ or discontin$ or coverage or variety or selection or spread or practice or convention)).ti,ab,ot. (70936)

47 45 or 46 (266896)

48 morbidity/ or incidence/ or prevalence/ or mortality/ (549771)

49 Demography/ (61201)

50 Epidemiology/ (12480)

51 disease progression/ (147969)

52 (occurrence$ or incidence$ or prevalence$ or episode$ or mortalit$ or morbidit$ or epidemiolog$ or demograph$).ti,ab,ot. (2379758)

53 or/48-52 (2674953)

54 or/30,44,47,53 (3618706)

55 15 and 54 (15266)

56 animals/ not (animals/ and humans/) (4708037)

57 (letter or editorial or historical article).pt. (1751143)

58 55 not (56 or 57) (14127)

59 limit 58 to yr="2012 -Current" (5380)

***Ovid MEDLINE(R) Epub Ahead of Print: November 30, 2017***

***Ovid MEDLINE(R) In-Process & Other Non-Indexed Citations: November 30, 2017***

***Ovid MEDLINE(R) Daily Update: November 22, 2017***

***Date searched: 1.12.17***

1 exp breast neoplasms/ or Carcinoma, Ductal, Breast/ (119)

2 exp breast/ (15)

3 exp neoplasms/ (1099)

4 2 and 3 (9)

5 (breast$ adj5 (neoplasm$ or cancer$ or tumo?r$ or metasta$ or carcinoma$ or adenocarcinoma$ or sarcoma$ or dcis or ductal or infiltrat$ or intraductal$ or lobular or medullary)).ti,ab,ot,hw. (34522)

6 (mammar$ adj5 (neoplas$ or cancer$ or tumo?r$ or metasta$ or carcinoma$ or adenocarcinoma$ or sarcoma$ or dcis or ductal or infiltrat$ or intraductal$ or lobular or medullary)).ti,ab,ot,hw. (1712)

7 1 or 4 or 5 or 6 (35312)

8 genes, brca1/ or genes, brca2/ (3)

9 brca1 protein/ or brca2 protein/ (3)

10 (BRCA or gBRCA or BRCA1 or BRCA2 or BRCAI or BRCAII or BRCC or BRCC1 or BRCCI or BRCC2 or BRCCII or BROVCA or BROVCA1 or BROVCAI or BROVCA2 or BROVCAII or "BR/OVCA" or "BR/OVCA1" or "BR/OVCAI" or "BR/OVCA2" or "BR/OVCAII" or "BRCA1/2").ti,ab,ot,hw. (2011)

11 (Familial or "family history" or heredit$ or inherit$ or predispo$ or susceptib$).ti,ab,ot,hw. (76908)

12 exp Genetic Predisposition to Disease/ (18)

13 (genetic or gene or genes).ti,ab,ot,hw. (221041)

14 or/8-13 (272252)

15 7 and 14 (7262)

16 absenteeism/ (0)

17 caregivers/ (5)

18 ((human$ or Social or societ$ or work$ or employe$ or business$ or communit$ or famil$ or carer$ or caregiver$) adj3 (Burden$ or Consequenc$ or impact$ or problem$ or productivity or sickness or impairment$)).ti,ab,ot,hw. (14132)

19 ((long standing or longstanding or long term or longterm or permanent or employee$) adj2 (absence$ or absent$ or ill$ or sick$ or disab$ or diseas$)).ti,ab,ot,hw. (1930)

20 (llsi or ((emergenc$ or domestic$ or famil$ or carer$ or caregiver$) adj3 leave$)).ti,ab,ot,hw. (103)

21 (burden adj2 (illness$ or disease$ or sickness$)).ti,ab,ot,hw. (3403)

22 ((allowance or status or long-term or pension$ or benefit$) adj2 (disab$ or incapacit$)).ti,ab,ot,hw. (1472)

23 ((unable or inability or incapacit$ or incapab$) adj3 work).ti,ab,ot,hw. (135)

24 ((resource$ or fund$) adj2 (use$ or utilis?ation)).ti,ab,ot,hw. (2846)

25 ("length of stay" or "duration of stay" or "extended stay" or "prolonged stay").ti,ab,ot,hw. (6572)

26 ((health or healthcare) adj2 (resource$ or fund$)).ti,ab,ot,hw. (3652)

27 ((ambulatory or ambulance or hospital or A&E or emergency) adj2 (attention$ or trip or trips or visit$ or stay$ or admission$ or admitted or transport$)).ti,ab,ot,hw. (17415)

28 ((GP or general practitioner$ or doctor$ or clinician$ or specialist$ or physician$) adj2 (appointment$ or attention or trip or trips or visit$)).ti,ab,ot,hw. (1316)

29 (in-patient stay$ or inpatient stay$).ti,ab,ot,hw. (299)

30 or/16-29 (49021)

31 economics/ (2)

32 exp "costs and cost analysis"/ (31)

33 economics, dental/ (1)

34 exp "economics, hospital"/ (1)

35 economics, medical/ (0)

36 economics, nursing/ (0)

37 economics, pharmaceutical/ (6)

38 (econom$ or cost or costs or costly or costing or price or prices or pricing or pharmacoeconomic$).ti,ab. (109604)

39 (expenditure$ not energy).ti,ab. (3211)

40 (value adj1 money).ti,ab. (4)

41 budget$.ti,ab. (4261)

42 or/31-41 (113872)

43 ((energy adj cost) or (metabolic adj cost) or (energy adj expenditure)).ti,ab. (2999)

44 42 not 43 (113025)

45 ((treatment$ or therapeutic or therapy or therapies) adj3 (pattern$ or trend$ or utili$ or management or prevalence or initiat$ or duration or distribution$ or discontin$ or coverage or variety or selection or spread or practice or convention)).ti,ab,ot. (28516)

46 ((medication$ or medicating or drug or drugs or prescrip$ or prescrib$) adj3 (pattern$ or trend$ or utili$ or management or prevalence or initiat$ or duration or distribution$ or discontin$ or coverage or variety or selection or spread or practice or convention)).ti,ab,ot. (9515)

47 45 or 46 (36746)

48 morbidity/ or incidence/ or prevalence/ or mortality/ (51)

49 Demography/ (5)

50 Epidemiology/ (51)

51 disease progression/ (29)

52 (occurrence$ or incidence$ or prevalence$ or episode$ or mortalit$ or morbidit$ or epidemiolog$ or demograph$).ti,ab,ot. (296262)

53 or/48-52 (296300)

54 or/30,44,47,53 (437534)

55 15 and 54 (1418)

56 animals/ not (animals/ and humans/) (457)

57 (letter or editorial or historical article).pt. (93449)

58 55 not (56 or 57) (1412)

59 limit 58 to yr="2012 -Current" (1080)

***CDSR (Wiley): Issue 11 of 12, November 2017***

***DARE (Wiley): Issue 2 of 4, April 2015***

***HTA Database (Wiley): Issue 4 of 4, October 2016***

***NHS EED (Wiley): Issue 2 of 4, April 2015***

***Searched: 30.11.17***

#1 MeSH descriptor: [Breast Neoplasms] explode all trees 10474

#2 MeSH descriptor: [Breast] explode all trees 734

#3 MeSH descriptor: [Neoplasms] explode all trees 63175

#4 #2 and #3 335

#5 ((breast) near/5 (neoplasm* or cancer* or tumo?r* or metasta* or carcinoma* or adenocarcinoma* or sarcoma* or dcis or ductal or infiltrat* or intraductal* or lobular or medullary)):ti,ab,kw 26077

#6 ((mammar*) near/5 (neoplasm* or cancer* or tumo?r* or metasta* or carcinoma* or adenocarcinoma* or sarcoma* or dcis or ductal or infiltrat* or intraductal* or lobular or medullary)):ti,ab,kw 204

#7 #1 or #4 or #5 or #6 26142

#8 MeSH descriptor: [Genes, BRCA1] this term only 105

#9 MeSH descriptor: [Genes, BRCA2] this term only 79

#10 MeSH descriptor: [BRCA1 Protein] explode all trees 59

#11 MeSH descriptor: [BRCA2 Protein] explode all trees 50

#12 (BRCA or gBRCA or BRCA1 or BRCA2 or BRCAI or BRCAII or BRCC or BRCC1 or BRCCI or BRCC2 or BRCCII or BROVCA or BROVCA1 or BROVCAI or BROVCA2 or BROVCAII or "BR/OVCA" or "BR/OVCA1" or "BR/OVCAI" or "BR/OVCA2" or "BR/OVCAII" or "BRCA1/2") 696

#13 (Familial or "family history" or heredit* or inherit* or predispo* or susceptib*) 23412

#14 MeSH descriptor: [Genetic Predisposition to Disease] explode all trees 1718

#15 (genetic or gene or genes) 33930

#16 #8 or #9 or #10 or #11 or #12 or #13 or #14 or #15 50043

**#17 #7 and #16 Publication Year from 2012 to 2017 2002**

CDSR = 50

DARE = 61

CENTRAL = 1825

Method Studies = 0

HTA = 33

NHS EED = 32

Cochrane Groups = 1

***CINAHL (EBSCO): 2012/01/02 - 2017/11/11
Searched 30.11.17***

S1 breast neoplasms 43,965

S2 MH breast 2,342

S3 MH neoplasms 39,982

S4 S2 OR S3 42,300

S5 TI ((breast) N5 (neoplasm* or cancer* or tumo?r* or metasta* or carcinoma* or adenocarcinoma* or sarcoma* or dcis or ductal or infiltrat* or intraductal* or lobular or medullary) 28,491

S6 AB ((breast) N5 (neoplasm* or cancer* or tumo?r* or metasta* or carcinoma* or adenocarcinoma* or sarcoma* or dcis or ductal or infiltrat* or intraductal* or lobular or medullary) 24,612

S7 TI ((mammar*) N5 (neoplasm* or cancer* or tumo?r* or metasta* or carcinoma* or adenocarcinoma* or sarcoma* or dcis or ductal or infiltrat* or intraductal* or lobular or medullary) 107

S8 AB ((mammar*) N5 (neoplasm* or cancer* or tumo?r* or metasta* or carcinoma* or adenocarcinoma* or sarcoma* or dcis or ductal or infiltrat* or intraductal* or lobular or medullary) 247

S9 S1 OR S4 OR S5 OR S6 OR S7 OR S8 89,618

S10 (MH "Hereditary Breast and Ovarian Cancer Syndrome") OR (MH "Genes, BRCA") 1,140

S11 TI BRCA or gBRCA or BRCA1 or BRCA2 or BRCAI or BRCAII or BRCC or BRCC1 or BRCCI or BRCC2 or BRCCII or BROVCA or BROVCA1 or BROVCAI or BROVCA2 or BROVCAII or "BR/OVCA" or "BR/OVCA1" or "BR/OVCAI" or "BR/OVCA2" or "BR/OVCAII" or "BRCA1/2" 1,001

S12 AB BRCA or gBRCA or BRCA1 or BRCA2 or BRCAI or BRCAII or BRCC or BRCC1 or BRCCI or BRCC2 or BRCCII or BROVCA or BROVCA1 or BROVCAI or BROVCA2 or BROVCAII or "BR/OVCA" or "BR/OVCA1" or "BR/OVCAI" or "BR/OVCA2" or "BR/OVCAII" or "BRCA1/2" 1,093

S13 TI Familial or "family history" or heredit* or inherit* or predispo* or susceptib* 9,954

S14 AB Familial or "family history" or heredit* or inherit* or predispo* or susceptib* 39,309

S15 (MH "Polymorphism, Genetic") 10,439

S16 TI genetic or gene or genes 23,228

S17 AB genetic or gene or genes 52,437

S18 S10 OR S11 OR S12 OR S13 OR S14 OR S15 OR S16 OR S17 97,506

S19 S9 AND S18 7,006

S20 S9 AND S18 Limiters - Published Date: 20120101-20171231 **2,405**

***EconLit (EBSCO): 1990/06/01-2017/10/01***

***Searched: 30.11.17***

S1 breast neoplasms 3

S2 breast 396

S3 neoplasms 104

S4 S2 OR S3 485

S5 TI ((breast) N5 (neoplasm* or cancer* or tumo?r* or metasta* or carcinoma* or adenocarcinoma* or sarcoma* or dcis or ductal or infiltrat* or intraductal* or

lobular or medullary) 150

S6 AB ((breast) N5 (neoplasm* or cancer* or tumo?r* or metasta* or carcinoma* or adenocarcinoma* or sarcoma* or dcis or ductal or infiltrat* or intraductal* or

lobular or medullary) 241

S7 TI ((mammar*) N5 (neoplasm* or cancer* or tumo?r* or metasta* or carcinoma* or adenocarcinoma* or sarcoma* or dcis or ductal or infiltrat* or intraductal* or

lobular or medullary) 1

S8 AB ((mammar*) N5 (neoplasm* or cancer* or tumo?r* or metasta* or carcinoma* or adenocarcinoma* or sarcoma* or dcis or ductal or infiltrat* or intraductal* or

lobular or medullary) 1

S9 S1 OR S4 OR S5 OR S6 OR S7 OR S8 485

S10 (MH "Hereditary Breast and Ovarian Cancer Syndrome") OR (MH "Genes, BRCA") 0

S11 TI BRCA or gBRCA or BRCA1 or BRCA2 or BRCAI or BRCAII or BRCC or BRCC1 or BRCCI or BRCC2 or BRCCII or BROVCA or BROVCA1 or BROVCAI or BROVCA2 or BROVCAII or "BR/OVCA" or "BR/OVCA1" or "BR/OVCAI" or "BR/OVCA2" or "BR/OVCAII" or "BRCA1/2" 7

S12 AB BRCA or gBRCA or BRCA1 or BRCA2 or BRCAI or BRCAII or BRCC or BRCC1 or BRCCI or BRCC2 or BRCCII or BROVCA or BROVCA1 or BROVCAI or BROVCA2 or BROVCAII or "BR/OVCA" or "BR/OVCA1" or "BR/OVCAI" or "BR/OVCA2" or "BR/OVCAII" or "BRCA1/2" 12

S13 TI Familial or "family history" or heredit* or inherit* or predispo* or susceptib* 700

S14 AB Familial or "family history" or heredit* or inherit* or predispo* or susceptib* 4,298

S15 (MH "Polymorphism, Genetic") 12

S16 TI genetic or gene or genes 1,260

S17 AB genetic or gene or genes 2,796

S18 S10 OR S11 OR S12 OR S13 OR S14 OR S15 OR S16 OR S17 7,844

S19 S9 AND S18 55

S20 S9 AND S18 19

***Northern Light Life Sciences Conference Abstracts (Ovid): 2014-2017 Week 47***

***Searched: 7.12.17***

1 (breast$ adj5 (neoplas$ or cancer$ or tumo?r$ or metasta$ or carcinoma$ or adenocarcinoma$ or sarcoma$ or dcis or ductal or infiltrat$ or intraductal$ or lobular or medullary)).ti,ab. (59371)

2 (mammar$ adj5 (neoplas$ or cancer$ or tumo?r$ or metasta$ or carcinoma$ or adenocarcinoma$ or sarcoma$ or dcis or ductal or infiltrat$ or intraductal$ or lobular or medullary)).ti,ab. (2646)

3 1 or 2 (60193)

4 (BRCA or gBRCA or BRCA1 or BRCA2 or BRCAI or BRCAII or BRCC or BRCC1 or BRCCI or BRCC2 or BRCCII or BROVCA or BROVCA1 or BROVCAI or BROVCA2 or BROVCAII or "BR/OVCA" or "BR/OVCA1" or "BR/OVCAI" or "BR/OVCA2" or "BR/OVCAII" or "BRCA1/2").ti,ab. (4304)

5 (Familial or "family history" or heredit$ or inherit$ or predispo$ or susceptib$).ti,ab. (79231)

6 (genetic or gene or genes).ti,ab. (246171)

7 4 or 5 or 6 (294579)

8 3 and 7 (12795)

9 ((human$ or social$ or societ$ or work$ or employe$ or business$ or communit$ or famil$ or carer$ or caregiver$) adj3 (burden$ or consequenc$ or impact$ or problem$ or productivity or sickness or impairment$)).ti,ab. (12359)

10 ((long standing or longstanding or long term or longterm or permanent or employee$) adj2 (absence$ or absent$ or ill$ or sick$ or disab$)).ti,ab. (950)

11 (llsi or ((emergenc$ or domestic$ or famil$ or carer$ or caregiver$) adj3 leave$)).ti,ab. (50)

12 (burden adj2 (illness$ or disease$ or sickness$)).ti,ab. (4200)

13 ((allowance or status or long-term or pension$ or benefit$) adj2 (disab$ or incapacit$)).ti,ab. (1128)

14 ((unable or inability or incapacit$ or incapab$) adj3 work).ti,ab. (114)

15 ((resource$ or fund$) adj2 (use$ or utili?ation)).ti,ab. (5409)

16 ((health or healthcare) adj2 (resource$ or fund$)).ti,ab. (4489)

17 ("length of stay" or "duration of stay" or "extended stay" or "prolonged stay").ti,ab. (6714)

18 ((ambulatory or ambulance or hospital or A&E or emergency) adj2 (attention$ or trip or trips or visit$ or stay$ or admission$ or admitted or transport$)).ti,ab. (13941)

19 ((GP or general practitioner$ or doctor$ or clinician$ or specialist$ or physician$) adj2 (appointment$ or attention$ or trip or trips or visit$)).ti,ab. (1005)

20 (in-patient stay$ or inpatient stay$).ti,ab. (477)

21 (econom$ or cost or costs or costly or costing or price or prices or pricing or pharmacoeconomic$).ti,ab. (100814)

22 (expenditure$ not energy).ti,ab. (2929)

23 (value adj2 money).ti,ab. (268)

24 budget$.ti,ab. (3532)

25 ((treatment$ or therapeutic or therapy or therapies) adj3 (pattern$ or trend$ or utili$ or management or prevalence or initiat$ or duration or distribution$ or discontin$ or coverage or variety or selection or spread or practice or convention)).ti,ab. (29859)

26 ((medication$ or medicating or drug or drugs or prescrip$ or prescrib$) adj3 (pattern$ or trend$ or utili$ or management or prevalence or initiat$ or duration or distribution$ or discontin$ or coverage or variety or selection or spread or practice or convention)).ti,ab. (10198)

27 (occurrence$ or incidence$ or prevalence$ or episode$ or mortalit$ or morbidit$ or epidemiolog$ or demograph$).ti,ab. (290234)

28 or/9-27 (433166)

29 8 and 28 (2084)

30 limit 29 to yr="2016 -Current" (253)

**CEA Registry (Internet): up to 30 Nov 2017**

[**www.cearegistry.org**](http://www.cearegistry.org)

**Searched 30.11.17**

**2012-Current**

| **Search terms** | **Results** |
| --- | --- |
| BRCA | 6 |
| **BRCC** | 0 |
| **gBRCA** | 0 |
| **BROVCA** | 0 |
| **Total** | **6** |

**ScHARR Health Utilities Database (ScHARRHUD)(Internet): up to 30 Nov 2017**

**www.scharrhud.org/**

**Searched 7.12.17**

**2012-2017**

| **Search terms** | **Results** |
| --- | --- |
| BRCA | 0 |
| **BRCC** | 0 |
| **gBRCA** | 0 |
| **BROVCA** | 0 |
| **Breast** | 7 |
| **Total** | **7** |

**NCCN 21st Annual Conference (**[**http://www.jnccn.org/content/14/5S/e-1.full.pdf+html**](http://www.jnccn.org/content/14/5S/e-1.full.pdf+html)**)**

**Searched 8.12.17**

| **Search terms** | **Hits** |
| --- | --- |
| BC | 5 |
| BRCA | 0/1 |
| BRCC | 0 |
| **Total** | **5** |

**Additional Conference Handsearching**

ESMO 2017 Abstract book: <http://www.esmo.org/content/download/117241/2057634/file/ESMO-2017-Abstract-Book.pdf>

San Antonio BC Symposium 2016 Abstract book: <https://www.sabcs.org/Portals/SABCS2016/Documents/SABCS-2016-Abstracts.pdf?v=1>

NCCN 2016 Abstracts from: http://www.jnccn.org/content/14/5S/e-1.full.pdf+html

# Appendix 2 FURTHER DETAILS OF PREVALENCE RESULTS

| **Country** | **Study ID** | **Germline reported** | **Deleterious reported** | **Selection** | **Hormone Receptor status** | **Breast cancer stage** | **No. at risk of mutation** | **% BRCA1/2** | **% *BRCA1*** | **% *BRCA2*** | **% *BRCA1* and *2*** |
| --- | --- | --- | --- | --- | --- | --- | --- | --- | --- | --- | --- |
| USA | Bayraktar, 20131 | Yes | deleterious | Mixed | Mixed | Metastatic | 195 | 21 | 15.0 | 6.0 | 0.0 |
| TNBC | 44 | 36.4 | 34.1 | 2.3 |
| Beck, 20172 | No | Young (<50 years) age at diagnosis | NR/unclear | 199 | 10.5 | NR | NR | NR |
| Biskupiak, 20173 | NR/unclear | NR/unclear | Mixed | Invasive | 816 | 16.4 |
| Buys, 20174 | pathogenic | Mixed | NR/unclear | 35409 | 4.6 | 2.3 | 2.3 | 0.0 |
| TNBC | 4797 | 9.8 | 7.2 | 2.6 |
| Couch, 20155 | Yes | deleterious | Unselected | 1824 | 11.2 | 8.5 | 2.7 |
| De La Cruz, 20126 | NR/unclear | Mixed | Invasive | 196 | 36 | 22.0 | 14.0 |
| Ellsworth, 20127 | Unsure | NR/unclear | Female, mixed | TNBC | NR/unclear | 154 | NA | 9.0 | NA | NA |
| Emborgo, 20168 | No | Unselected | 377 | 14 | 12.7 | 0.8 | 0.0 |
| Greenup, 20139 | No | NR/unclear | NR/unclear | TNBC | NR/unclear | 450 | 31 | 23.6 | 7.1 | 0.2 |
| Guerra, 201710 | Yes | deleterious | Hispanic | NR/unclear | 2329 | 13.1 | 8.0 | 5.1 | 0.0 |
| Hartman ,201211 | No | Unselected | TNBC | 199 | 10.6 | 6.5 | 4.0 |
| Keung, 201212 | Yes | Mixed | Mixed | Metastatic | 1 | NA | NA | 100.0 | NA |
| Mixed | 26 | 34.6 |
| Locally advanced | 4 | 75 |
| TNBC | NR/unclear | 3 | 33.3 |
| Pal, 201213 | No | NR/unclear | Black women with early onset BC | NR/unclear | Invasive | 48 | 6.25 | 2.1 | 4.2 | 0.0 |
| Pal, 201314 | Unsure | pathogenic | Female, black, diagnosed age ≤50 years | 46 | 6.5 | NR | NR | NR |
| Pal, 201415 | No | NR/unclear | Mixed | 283 | 9.9 | 6.4 | 3.5 | 0.0 |
| Pal, 201416 | Unsure | deleterious | 144 | 9.0 | NR | NR | NR |
| Pal, 201517 | No | pathogenic | 396 | 12.4 | 8.1 | 3.8 | 0.0 |
| TNBC | 66 | 30 | NR | NR | NR |
| Petersen, 201618 | NR/unclear | Age <60 years at diagnosis | NR/unclear | 87 | 17.2 |
| Rummel, 201319 | Yes | deleterious | Unselected | Mixed | 182 | NA | 9.0 | NA | NA |
| Rummel, 201720 | pathogenic | Unselected, early onset (age <40 years) | Mixed | 118 | 18.6 | 8.5 | 10.2 | 0 |
| Sanford, 201421 | deleterious | NR/unclear | TNBC | NR/unclear | 122 | 27 | NR | NR | NR |
| HR- and low+, HER2- | 144 | 27.8 |
| Sanford, 201522 | TNBC | 238 | 36.1 |
| HR- and low+, HER2- | 314 | 36.9 | 29.9 | 7 | 0 |
| Sharma, 201423 | Unselected | TNBC | Mixed | 207 | 15.4 | 11.1 | 4.3 |
| Family history | 128 | 21.1 | NR | NR | NR |
| Skandan, 201624 | No | NR/unclear | NR/unclear | Mixed | 32 | 46.9 | 28.1 | 18.8 | 0.0 |
| Stadler, 201225 | Yes | deleterious | Ashkenazi, family history of pancreatic cancer | NR/unclear | NR/unclear | 211 | 14.2 | 6.6 | 7.6 |
| Susswein, 201626 | No | pathogenic | Female, no known previous BRCA testing | 3315 | 9.7 | NR | NR | NR |
| Tung, 201527 | Yes | deleterious | Ashkenazi excluded | 1781 | 9.3 |
| Tung, 201628 | Female | HR+/HER2- | Stages I to III | 301 | 5.0 | 1.7 | 3.3 | 0.0 |
| Mixed | 488 | 6.1 | 3.7 | 2.5 |
| TNBC | 87 | 13.8 | 12.6 | 1.1 |
| Weitzel, 201329 | No | Family history, Hispanic | NR/unclear | NR/unclear | 610 | 24.9 | NR | NR | NR |
| Welinsky, 201630 | Unselected | 191 | 12 | 6.3 | 6.2 | 0.0 |
| Vidula, 201731 | Yes | NR/unclear | Metastatic BC | Mixed | Metastatic | 178 | 3.7 | NR | NR | NR |
| No | 15.2 |
| Ross, 201732 | Yes | pathogenic | Female with multiple BC primaries | NR/unclear | NR/unclear | 65 | NR | 26.0 | 13.0 |
| Ellsworth, 201733 | Females with TNBC | TNBC | 196 | 9.7 | 7.1 | 2.6 |
| UK | Eccles, 201634 | Unsure | Mixed | HER2+, HR status unknown | Mixed | 101 | 11 | 5 | 6 | 0 |
| Eccles, 201735 | No | Age <40 years at diagnosis | TNBC | NR/unclear | 542 | NA | 22.5 | NA | NA |
| Rahman, 201736 | NR/unclear | BC age <40 years or bilateral BC age <60 years or TNBC or breast + ovarian cancer or male BC | NR/unclear | 1020 | 10.8 | NR | NR | NR |
| Family history, othera | 368 | 5.4 |
| Robertson, 201237 | Unselected | TNBC | 159 | NA | 9.4 | NA | NA |
| Family history and/or young age at diagnosis | 149 | 20.1 |
| Spain | Andres, 201438 | Yes | pathogenic | No family history, diagnosed at age <50 years | 92 | 7.6 |
| de Juan Jimenez, 201239 | deleterious | Sporadic BC (no family history or other criteria for hereditary BC screening) | Mixed | Metastatic | 23 | 0 | NR | NR | NR |
| Mixed | 495 | 1.8 | 0.6 | 1.2 | 0.0 |
| Gonzalez-Rivera, 201640 | Unselected | TNBC | Stages II-III | 105 | 14.28 | 12.4 | 1.9 |
| Zugazazoitia, 201441 | Mixed | Mixed | Mixed | 341 | 7 | 4.1 | 2.9 |
| TNBC | 57 | 14 | 12.3 | 1.8 |
| Australia | Duffy, 201242 | No | NR/unclear | Aged <31 years at diagnosis | NR/unclear | NR/unclear | 91 | 29.7 | NR | NR | NR |
| Wong-Brown, 201543 | Yes | deleterious | Unselected | TNBC | Mixed | 439 | 9.3 | 5.9 | 3.4 | 0.0 |
| Canada | Ghadirian, 201444 | No | NR/unclear | Family history 51+, all women 50- | Mixed | 1093 | 5.1 | 1.2 | 3.9 |
| Vanstone, 201245 | NR/unclear | NR/unclear | NR/unclear | 1003 | 12.2 | NR | NR | NR |
| France | Meynard, 201746 | Yes | pathogenic | Unselected | Metastatic | 407 | 2.7 | 0.7 | 2.0 | 0.0 |
| Tunon De Lara, 201747 | deleterious | Decided with each patient, based on age, family history and tumor histology | Mixed | NR/unclear | 25 | 40 | 32.0 | 8.0 |
| Germany | Kast, 201648 | pathogenic | Family history | NR/unclear | 59304 | 26.5 | 17.2 | 9.3 |
| Rhiem, 201649 | No | deleterious | Without family history | TNBC | 750 | 21.5 | NR | NR | NR |
| Fasching, 201750 | Yes | NR/unclear | Unselected | NR/unclear | Metastatic | 1462 | 4.3 | 1.4 | 2.9 |
| Israel | Asleh-Aburaya, 201551 | No | Family history | TNBC | Mixed | 30 | 73.3 | NR | NR |
| Dagan, 201752 | Female, Ashkenazi, Early Onset | Mixed | Metastatic | 3 | 0 | 0.0 | 0.0 | 0 |
| Mixed | 149 | 32.2 | 22.1 | 10.1 |
| Locally advanced | 13 | 53.8 | 23.1 | 30.8 |
| Israel/Palestine | Lolas Hamameh, 201753 | Yes | pathogenic | Diagnosis age ≤ 40 years, or with family history | Mixed | 453 | 6.8 | 2.4 | 4.4 |
| TNBC | 44 | 15.9 | 9.1 | 6.8 |
| Italy | Loi, 201754 | No | NR/unclear | High individual or familial BC risk (age at diagnosis <50 years, contralateral BC, personal or family history of male BC/*BRCA* mutation/ovarian cancer) | Mixed | 86 | NR | 38.3 | 18.6 | NR |
| Musolino, 201255 | Yes | Unselected | NR/unclear | NR/unclear | 55 | 23.6 | NR | NR |
| Japan | Kitagawa, 201456 | No | deleterious | NR/unclear | TNBC | 123 | 15.4 |
| Russia | Cherdyntseva, 201457 | Yes | NR/unclear | Family history | NR/unclear | 765 | NA | 3.5 | NA | NA |
| Polonikov, 201558 | No | NR/unclear | 217 | 3.2 |
| Sardinia/Italy | Palomba, 201459 | Yes | deleterious | Unselected | Mixed | 726 | 2.9 | 1.0 | 1.9 | 0.0 |
| TNBC | 49 | 14.3 | NR | NR | NR |
| South Korea | Han, 201360 | No | Family history | NR/unclear | 775 | 21.7 | 9.3 | 12.4 | 0 |
| Jung, 201661 | Yes | Mixed | Invasive | 181 | 18.8 | 8.8 | 9.9 |
| Mixed | 411 | 12.2 | 6.1 | 6.1 |
| Kang, 201562 | No | pathogenic | Family history | NR/unclear | 1228 | 22.3 | NR | NR | NR |
| Family history of breast or ovarian cancer or diagnosis age ≤40 years with bilateral BC or BC with other primary malignancy or male BC, in accordance with the standard of National Medical Insurance Reimbursement in Korea | 2403 | 15.7 | 6.4 | 9.2 | 0 |
| Kim, 201263 | Yes | Unselected | NR/unclear | 471 | 3 | 1.5 | 1.5 |
| NR/unclear | 2139 | 12.3 | 5.9 | 6.4 |
| High risk (early onset BC, bilateral BC, male BC, or cancer of multiple organs that include breast) | 1668 | 15.0 | 7.4 | 7.8 |
| Lee, 201564 | No | NR/unclear | NR/unclear | TNBC | 534 | 32.0 | 22.8 | 8.4 |
| Noh, 201365 | Unsure | Family history of breast or ovarian cancer or <40 years of age at diagnosis or bilateral BC, or male gender | Mixed | 209 | 22 | 10 | 12 | 1 |
| Park, 201766 | pathogenic | Family history of breast or ovarian cancer or diagnosis age ≤40 years with bilateral BC or BC with other primary malignancy or male BC, in accordance with the standard of National Medical Insurance Reimbursement in Korea | HR+/HER2- | Mixed | 252 | 9.9 | 2.4 | 7.5 | 0 |
| Mixed | 478 | 13.2 | 6.3 | 6.9 |
| TNBC | 76 | 29 | 25 | 4 |
| Seong, 201467 | Yes | clinically significant | Family history, female | Mixed | 221 | 36.7 | 18.1 | 18.6 |
| TNBC | 42 | 59.5 | 47.6 | 11.9 |
| Sohn, 201668 | No | NR/unclear | Unselected | NR/unclear | NR/unclear | 358 | 14.8 | NR | NR | NR |
| Son, 201269 | High risk (early onset BC defined as diagnosis age ≤ 40, bilateral BC, personal history of breast and ovarian cancer, male BC, or cancer of multiple organs that include breast) | 758 | 8.6 | 3.3 | 5.3 | 0.13 |
| Yoon, 201770 | pathogenic | Mixed | Mixed | 328 | 14.3 | 6.1 | 8.2 | 0 |

**Note:** aNot fulfilling any of the following criteria: BC <40 years, bilateral BC <60 years, TNBC, BC + ovarian cancer, male BC.

**Abbreviations:** BC, breast cancer; *BRCA*, BC susceptibility gene; HER2-, human epidermal growth factor receptor 2–negative; HR+, hormone receptor– positive; ID, identification; low+ indicates 1%-9% on immunohistochemistry; NA, not applicable; NR, not reported; TNBC, triple-negative BC.

# Appendix 3: EXCLUDED STUDIES

| **Reason** | **Reference** |
| --- | --- |
| **Population** | Akdeniz D, Tuncer BS, Kilic S, Sukruoglu O, Kilic L, Altundag K, et al. Distribution and frequency of BRCA gene mutations in Turkish population including Balkan Turks. *Cancer Res*. 2014;74(23):Abstract 43. |
| Alemar B, Gregorio C, Artigalas O, Netto C, Ashton-Prolla P. Prevalence of BRCA1 and BRCA2 mutations in patients fulfilling HBOC criteria in South Brazil. *J Clin Oncol*. 2015;33(15 Suppl):e12529. |
| Alemar B, Herzog J, Ashton-Prolla P, Weitzel J. Prevalence of Hispanic BRCA1 and BRCA2 mutations among HBOC patients from Southern Brazil reveal differences among Latin American populations. *Cancer Res*. 2016;76(4 Suppl):Abstract P2-09-12. |
| Alemar B, Herzog J, Brinckmann Oliveira Netto C, Artigalas O, Schwartz IVD, Matzenbacher Bittar C, et al. Prevalence of Hispanic BRCA1 and BRCA2 mutations among hereditary breast and ovarian cancer patients from Brazil reveals differences among Latin American populations*. Cancer Genet*. 2016;209(9):417-422. |
| Ancot F, Arcand SL, Nolet S, Mes-Masson AM, El Haffaf Z, Provencher DM, et al. Double heterozygotes for PALB2 and BRCA1/BRCA2 mutation carriers in French Canadian hereditary BC patients. *Curr Oncol*. 2014;21(2):e367. |
| Arai M, Yokoyama S, Watanabe C, Yoshida R, Kita M, Okawa M, et al. Genetic and clinical characteristics in Japanese hereditary breast and ovarian cancer: first report after establishment of HBOC registration system in Japan. *J Hum Genet*. 2017:1-11. |
| Ashton-Prolla P, Vargas FR. Prevalence and impact of founder mutations in hereditary BC in Latin America. *Genet Mol Biol*. 2014;37(1 Suppl 1):234-240. |
| Blok EJ, Bastiaannet E, van den Hout WB, Liefers GJ, Smit VTHBM, Kroep JR, et al. Systematic review of the clinical and economic value of gene expression profiles for invasive early BC available in Europe. *Cancer Treat Rev*. 2018;62:74-90. |
| Caputo S, Benboudjema L, Sinilnikova O, Rouleau E, Beroud C, Lidereau R, et al. Description and analysis of genetic variants in French hereditary breast and ovarian cancer families recorded in the UMD-BRCA1/BRCA2 databases. *Nucleic Acids Res*. 2012;40(D1):D992-D1002. |
| Chang Y, Near AM, Butler KM, Hoeffken A, Edwards SL, Stroup AM, et al. Economic evaluation alongside a clinical trial of telephone versus in-person genetic counseling for BRCA1/2 mutations in geographically underserved areas. *J Oncol Pract*. 2016;12(1):e1-e13. |
| Collet G, Parodi N, Cassinari K, Neviere Z, Cohen F, Gasnier C, et al. Cost-effectiveness evaluation of pre-counseling telephone interviews before face-to-face genetic counseling in cancer genetics. *Fam Cancer*. 2017:1-7. |
| DaCosta Byfield S, Buck PO, Blauer-Peterson C, Poston SA, DaCosta Byfield S, Buck PO, et al. ReCAP: treatment patterns and cost of care associated with initial therapy among patients diagnosed with operable early-stage human epidermal growth factor receptor 2-overexpressed BC in the United States: a real-world retrospective study. *J Oncol Pract*. 2016;12(2):159-167. |
| De Bruin MA, Kwong A, Goldstein BA, Lipson JA, Ikeda DM, McPherson L, et al. BC risk factors differ between Asian and white women with BRCA1/2 mutations. *Fam Cancer*. 2012;11(3):429-439. |
| Dodova R, Mitkova A, Dacheva D, Taushanova M, Valev S, Vlahova A, et al. 583: Recurrent BRCA1/2 mutations in Bulgarian patients with hereditary breast and ovarian cancer. *Eur J Cancer*. 2014;50(Suppl 5):S140–S140. |
| Ellingson MS, Hart SN, Kalari KR, Suman V, Schahl KA, Dockter TJ, et al. Exome sequencing reveals frequent deleterious germline variants in cancer susceptibility genes in women with invasive BC undergoing neoadjuvant chemotherapy. *Breast Cancer Res Treat*. 2015;153(2):435-443. |
| Habak N, Ladjroud A, Benzidane N, Chikouche A, Ait Abdallah M, Bouzid K, et al. BRCA1 and BRCA2 germline mutations in Algerian familial breast and or ovarian cancer patients. *Clin Chem Lab Med*. 2017;55:S951. |
| Hirotsu Y, Nakagomi H, Sakamoto I, Amemiya K, Mochizuki H, Omata M. Detection of BRCA1 and BRCA2 germline mutations in Japanese population using next-generation sequencing. *Mol Gen Genomic Med*. 2015;3(2):121-129. |
| Jakub J, Peled A, Gray R, Greenup R, Kiluk J, Sacchini V, et al. Multi-institutional study of the oncologic safety of prophylactic nipple-sparing mastectomy in a BRCA population. *Ann Surg Oncol*. 2016;23(3 Suppl):311. |
| Joyce D, Heneghan H, Curran C, O'Neill C, Kerin M. The economic impact of BC management. *Ir J Med Sci*. 2014;183(5 Suppl 1):S235. |
| Kim RS, Peterson A, Isherwood A, Uppal H, Barlev A. Incidence of germline BRCA 1 and 2 mutated BC in the EU5. *Value Health*. 2016;19(7):A715. |
| Kolben T, Hary T, Holdt LM, Schwarz TM, Goess C, Wuerstlein R, et al. Thyroid hormones and vitamin D in patients with breast cancer with mutations in BRCA1 or BRCA2 genes. *Anticancer Res*. 2016;36(6):3185. |
| Konstantopoulou I, Tsitlaidou M, Fostira F, Pertesi M, Stavropoulou AV, Triantafyllidou O, et al. High prevalence of BRCA1 founder mutations in Greek breast/ovarian families. *Clin Genet*. 2014;85(1):36-42. |
| Kuo WH, Lin PH, Huang AC, Chien YH, Liu TP, Lu YS, et al. Multimodel assessment of BRCA1 mutations in Taiwanese (ethnic Chinese) women with early-onset, bilateral or familial BC. *J Hum Genet*. 2012;57(2):130-138. |
| Laraqui A, Uhrhammer N, Rhaffouli HE, Sekhsokh Y, Lahlou-Amine I, Bajjou T, et al. BRCA genetic screening in Middle Eastern and North African: mutational spectrum and founder BRCA1 mutation (c.798_799delTT) in North African. *Dis Markers*. 2015;2015:194293. |
| Lin Y, Tang C, Chien L, Liao C. Costs and life expectancy increased among patients with breast cancer across two time periods. *Value Health*. 2017;20(9):A466. |
| Luporsi E, Bronner M, Lesur A, Saint-Dizier D, Sokolowska J, Mansuy L, et al. Characteristics of the BRCA mutation profile of a population of patients with triple negative BC. *Cancer Res*. 2013;73(24 Suppl): Abstract P2-12-02. |
| Lux MP, Nabieva N, Hildebrandt T, Rebscher H, Kummel S, Blohmer JU, et al. Budget impact analysis of gene expression tests to aid therapy decisions for breast cancer patients in Germany. *Breast.* 2018;37:89-98. |
| Metcalfe K, Ghadirian P, Lynch HT, Snyder C, Foulkes WD, Tung N, et al. The impact of oophorectomy on survival after breast cancer in BRCA1 and BRCA2 mutation carriers. *Curr Oncol*. 2014;21(2):e361. |
| Nelson HD, Pappas M, Zakher B, Mitchell JP, Okinaka-Hu L, Fu R. Risk assessment, genetic counseling, and genetic testing for BRCA-related cancer in women: a systematic review to update the U.S. Preventive Services Task Force Recommendation. *Ann Intern Med*. 2014;160(4):255-266. |
| Olson MA, Tutera S, Williams C. Implementation of genetic sequencing in breast and ovarian cancer patients: a cost analysis. *Cancer Res*. 2015;75(15 Suppl):Abstract 5490. |
| Retel VP, Joore MA, Drukker CA, Bueno-De-Mesquita JM, Knauer M, Van Tinteren H, et al. Prospective cost-effectiveness analysis of genomic profiling in breast cancer. *Eur J Cancer*. 2013;49(18):3773-3779. |
| Riahi A, Chabouni-Bouhamed H, Kharrat M. Prevalence of BRCA1 and BRCA2 large genomic rearrangements in Tunisian high risk breast/ovarian cancer families: implications for genetic testing. *Cancer Genet*. 2017;210:22-27. |
| Ricks-Santi L, McDonald JT, Gold B, Dean M, Thompson N, Abbas M, et al. Next generation sequencing reveals high prevalence of BRCA1 and BRCA2 variants of unknown significance in early-onset BC in African American women. *Ethn Dis*;2017;27(2):169-178. |
| Roberts MC, Dusetzina SB. Use and costs for tumor gene expression profiling panels in the management of BC from 2006 to 2012: implications for genomic test adoption among private payers. *J Oncol Pract*. 2015;11(4):273-277. |
| Santonocito C, Scapaticci M, Guarino D, Bartolini A, Minucci A, Concolino P, et al. Identification of twenty-nine novel germline unclassified variants of BRCA1 and BRCA2 genes in 1400 Italian individuals. *Breast*. 2017;36:74-78. |
| Slade I, Hanson H, George A, Kohut K, Strydom A, Wordsworth S, et al. A cost analysis of a cancer genetic service model in the UK. *J Community Genet*. 2016;7(3):185-194. |
| Topczewska-Bruns J, Hempel D, Pancewicz-Janczuk B, Kazberuk D, Rozkowska E, Huzarski T, et al. Clinical features and treatment outcome in BRCA1-postive breast cancer patients n single institution analysis. *Radiother Oncol*. 2015;115:S646. |
| Vaca-Paniagua F, Alvarez-Gomez RM, Fragoso-Ontiveros V, Vidal-Millan S, Herrera LA, Cantu D, et al. Full-exon pyrosequencing screening of BRCA germline mutations in Mexican women with inherited breast and ovarian cancer. *PLoS One*. 2012;7(5). |
| Vietri MT, Molinari AM, De Paola ML, Cantile F, Fasano M, Cioffi M. Identification of a novel in-frame deletion in BRCA2 and analysis of variants of BRCA1/2 in Italian patients affected with hereditary breast and ovarian cancer. *Clin Chem Lab Med*. 2012;50(12):2171-2180. |
| Vig HS, McCarthy AM, Liao K, Demeter MB, Fredericks T, Armstrong K. Age at diagnosis may trump family history in driving BRCA testing in a population of breast cancer patients. *Cancer Epidemiol Biomark Prev*. 2013;22(10):1778-1785. |
| **Outcome** | Cherbal F, Gaceb H, Mehemmai C, Saiah I, Bakour R, Ould-Rouis A, et al. Triple-negative breast cancer in Algerian population: Clinicopathological and molecular study. *Cancer Res*. 2015;75(15 Suppl):Abstract 5284. |
| Cho JY, Cho DY, Ahn SH, Choi SY, Shin I, Park HG, et al. Large genomic rearrangement of BRCA 1 and BRCA2 genes in familial breast cancer patients in South Korea. *Fam Cancer*. 2014;13(2):205-211. |
| D'Argenio V, Esposito MV, D'Aiuto M, Precone V, Cantiello P, Calabrese A, et al. BRCA1 and BRCA2 rapid germline mutations screening by next generation sequencing approach. *Biochimica Clinica*. 2013;37:S166. |
| Gustavsen G, Schroeder B, Kennedy P, Pothier KC, Schnabel CA, Erlander MG. Health economic analysis of Breast Cancer Index in patients with ER+, LN- breast cancer. *J Clin Oncol*. 2013. |
| Hartwig M, Janiszewska H, Bak A, Pilarska M, Heise M, Junkiert-Czarnecka A, et al. Prevalence of the BRCA1 c.68_69delAG (BIC: 185delAG) mutation in women with breast cancer from north-central Poland and a review of the literature on other regions of the country. *Contemp Oncol (Pozn)*. 2013;17(1):34-37. |
| Hernan I, Mane B, Borras E, de Sousa Dias M, Llort G, Yague C, et al. Two novel frameshift mutations in BRCA2 gene detected by next generation sequencing in a survey of Spanish patients of breast cancer. *Clin Transl Oncol*. 2015;17(7):576-580. |
| Ho AY, Amoroso K, Wilgucki M, Vora K, Arnold BB, Powell SN, et al. Prevalence and impact of variants of uncertain significance on local therapy decision-making in newly diagnosed breast cancer patients. *Int J Radiat Oncol Biol Phys*. 2017;99(2):E2. |
| Hornberger J, Michael DA, Rebecca C, Hialy RG, Tiffany MY, William JG. Clinical validity/utility, change in practice patterns, and economic implications of risk stratifiers to predict outcomes for early-stage breast cancer: a systematic review. *J Natl Cancer Inst*. 2012;104(14):1068-1079. |
| Kang E, Kim D, Yom CK, Kim SW, Ahn SH, Park SK, et al. South Korean hereditary breast cancer (KOHBRA) study. *Eur J Cancer*. 2012;48:S77-S78. |
| Kim R, Peterson A, Isherwood A, Uppal H, Barlev A. Incidence of germline BRCA1-and BRCA2-mutated breast cancer in the US. *Cancer Res*. 2017;77(4 Suppl):Abstract P5-08-28. |
| Kim RS, Peterson A, Isherwood A, Uppal H, Barlev A. Incidence of germline BRCA 1 and 2 mutated breast cancer in the EU5. *Value Health*. 2016;19:A715. |
| Ou J, Wu T, Ni D, Xu W, Chen L, Halmurat U. BRCA1 and BRCA2 deleterious mutations in 68 patients with hereditary predisposition to breast cancer among multiple ethnic groups in Xinjiang. *Chin J Clin Oncol*. 2012;39(20):1539-1541. |
| Petelin L, Trainer A, Liew D, James P, Mitchell G. A systematic review of comparative effectiveness models and economic evaluations for cancer risk management strategies in brca1/2 mutation carriers. *Asia Pac J Clin Oncol.* 2016;12:155-156. |
| Ragaz J, Coldman A, Fox J, Wilson KS, Shakeraneh S, Zheng Y, et al. breast cancer incidence among young women of urban China (Shanghai) and in Canada: implications for prevention. *J Clin Oncol*. 2014;32(15 Suppl):1576. |
| Riahi A, Kharrat M, Ghourabi ME, Khomsi F, Gamoudi A, Lariani I, et al. Mutation spectrum and prevalence of BRCA1 and BRCA2 genes in patients with familial and early-onset breast/ovarian cancer from Tunisia. *Clin Genet*. 2015;87(2):155-160. |
| Son BH, Ahn SH, Yu JH, Kim HJ, Ko BS, Cho JY, et al. Analysis of large genomic rearrangements of BRCA1/2 genes in South Korean breast cancer patients. *Eur J Cancer*. 2012;48:S120-S121. |
| Torous VF, Schnitt S, Garber J, Hacker M, Poles E, Alexander B, et al. Prevalence of androgen receptor expression in triple negative breast cancers according to BRCA1 mutation status. *Lab Invest*. 2015;95:44A. |
| Zhang J, Fackenthal JD, Zheng Y, Huo D, Hou N, Niu Q, et al. Recurrent BRCA1 and BRCA2 mutations in breast cancer patients of African ancestry. *Breast Cancer Res Treat*. 2012;134(2):889-894. |
| Zonno KD, Kaldate RR, Arnell C, Saam J, Abbott B, Hartman AR. BRCA1/2 mutation prevalence among triple-negative breast cancer patients from a large commercial testing cohort. *J Clin Oncol*. 2013;(15_suppl):1544. |
| **Not relevant study design** | Bayraktar S, Gluck S. Systemic therapy options in BRCA mutation-associated breast cancer. *Breast Cancer Res Treat*. 2012;135(2):355-366. |
| Isherwood A, Duval A, Parihar N. BRCA1/2-mutated breast cancer in select EU markets: incidence, treatable populations, and potential market size for PARP inhibitors. *Value Health*. 2017;20(9):A468. |
| Kohut K, D'Mello L, Bancroft EK, Thomas S, Young MA, Myhill K, et al. Implications for cancer genetics practice of pro-actively assessing family history in a General Practice cohort in North West London. *Fam Cancer*. 2012;11(1):107-113. |
| Neamatzadeh H, Shiryazdi SM, Kalantar SM. BRCA1 and BRCA2 mutations in Iranian breast cancer patients: a systematic review. *J Res Med Sci*. 2015;20(3):284-293. |
| Ragaz J, Coldman A, Wilson KS, Fox J, Shakeraneh S, Wong H, et al. Long-term breast cancer outcomes in Canada with special analyses of cancer care access and mortality reduction. *J Clin Oncol*. 2014;32(15 Suppl):1601. |
| Rosenthal E, Moyes K, Arnell C, Evans B, Wenstrup RJ. Incidence of BRCA1 and BRCA2 non-founder mutations in patients of Ashkenazi Jewish ancestry. *Breast Cancer Res Treat*. 2015;149(1):223-227. Erratum in *Breast Cancer Res Treat*. 2015;151(1):233. |
| Valachis A, Nearchou AD, Lind P. Surgical management of breast cancer in BRCA-mutation carriers: a systematic review and meta-analysis. *Breast Cancer Res Treat*. 2014;144(5):443-455. |
| **Background** | Braga TL, Portilho FL, Santos-Oliveira R. breast cancer treatment protocols: Systematic review of the last 35 years. *J Anal Oncol*. 2017;6(2):57-102. |
| Cherbal F, Bakour R, Adane S, Boualga K. BRCA1 and BRCA2 germline mutation spectrum in hereditary breast/ovarian cancer families from Maghrebian countries*. Breast Dis*. 2013;34(1):1-8. |
| Dutil J, Golubeva VA, Pacheco-Torres AL, Diaz-Zabala HJ, Matta JL, Monteiro AN. The spectrum of BRCA1 and BRCA2 alleles in Latin America and the Caribbean: a clinical perspective. *Breast Cancer Res Treat*. 2015;154(3):441-453. |
| Forat-Yazdi M, Neamatzadeh H, Sheikhha MH, Zare-Shehneh M, Fattahi M. BRCA1 and BRCA2 common mutations in Iranian breast cancer patients: a meta analysis. *Asian Pac J Cancer Prev*. 2015;16(3):1219-1224. |
| Freeman AH, Powell CB, Kutner S, Janes K. Cost savings of population based genetic testing among Ashkenazi Jewish adult females in Northern California. *Gynecol Oncol*. 2016;143(1):195-196. |
| Jara L, Morales S, de Mayo T, Gonzalez-Hormazabal P, Carrasco V, Godoy R. Mutations in BRCA1, BRCA2 and other breast and ovarian cancer susceptibility genes in Central and South American populations. *Biol Res*. 2017;50(1):35. |
| Kang E, Kim SW. The South Korean hereditary breast cancer study: review and future perspectives. *J Breast Cancer*. 2013;16(3):245-253. |
| Kim H, Choi DH. Distribution of BRCA1 and BRCA2 mutations in Asian patients with breast cancer. *J Breast Cancer*. 2013;16(4):357-365. |
| Kwong A, Ng EKO, Wong CLP, Law FBF, Au T, Wong HN, et al. Identification of BRCA1/2 founder mutations in Southern Chinese breast cancer patients using gene sequencing and high resolution DNA melting analysis. *PLoS One*. 2012;7(9). |
| Laraqui A, Uhrhammer N, El Rhaffouli H, Sekhsokh Y, Lahlou-Amine I, Bajjou T, et al. BRCA genetic screening in Middle Eastern and North African: Mutational spectrum and founder BRCA1 mutation (c.798-799delTT) in North African. *Dis Markers*. 2015;2015(194293):8. |
| Mirza MM, McCular B, Martin MG. Therapy related myeloid and lymphoid neoplasms in BRCA mutated breast and ovarian cancer patients*. Blood*. 2016;128(22):5115. |
| Nelson HD, Fu R, Goddard K, Mitchell JP, Okinaka-Hu L, Pappas M, et al. Risk assessment, genetic counseling, and genetic testing for BRCA-related cancer: systematic review to update the U.S. preventive services task force recommendation. Agency for Healthcare Research Quality; 2014. <https://www.ncbi.nlm.nih.gov/books/NBK179201/pdf/Bookshelf_NBK179201.pdf>. Accessed February 15, 2019. |
| Sullivan W, Evans DG, Newman WG, Ramsden SC, Scheffer H, Payne K. Developing national guidance on genetic testing for breast cancer predisposition: the role of economic evidence? *Genet Test Mol Biomarkers*. 2012;16(6):580-591. |
| Tun NM, Villani G, Ong K, Yoe L, Bo ZM. Risk of having BRCA1 mutation in high-risk women with triple-negative breast cancer: a meta-analysis. *Clin Genet*. 2014;85(1):43-48. |
| Wang F, Fang Q, Ge Z, Yu N, Xu S, Fan X. Common BRCA1 and BRCA2 mutations in breast cancer families: a meta-analysis from systematic review. *Mol Biol Rep*. 2012;39(3):2109-2118. |
| **Duplicate** | Seong MW, Cho SI, Kim KH, Chung IY, Kang E, Lee JW, et al. A multi-institutional study of the prevalence of BRCA1 and BRCA2 large genomic rearrangements in familial breast cancer patients. *BMC Cancer*. 2014;14(1). |
| Xiong WW, Nyin LK, Jamie A, Luccarini C, Mariapun S, Har YC, et al. Inherited mutations in BRCA1 and BRCA2 in an unselected multi-ethnic cohort of Asian breast cancer patients and healthy controls from Malaysia. Presented at: American Association for Cancer Research Annual Meeting 2017; 01-Apr-2017. American Association for Cancer Research (AACR). Available at: https://discovery.northernlight.com/document.php?datasource=PHE&docid=PE20170410130002440&context=WK%40northernlight.com. |
| Yang X, Devi B, Sung H, Guida J, Xiao Y, Garland L, et al. Prevalence and spectrum of germline rare variants in BRCA1/2 and PALB2 among breast cancer cases in Sarawak, Malaysia. Presented at: American Association for Cancer Research Annual Meeting 2017; 01-Apr-2017. American Association for Cancer Research (AACR). Available at: https://discovery.northernlight.com/document.php?datasource=PHE&docid=PE20170410040001000&context=WK%40northernlight.com |
| **Unobtainable (Other country/or not available)** | Elsakov P, Ostapenko V, Luksyte A, Smailyte G. Management and 5-year survival of BRCA1-associated breast cancer patients. *Breast Cancer Manag*. 2016;5(3):119-124. |
| Ortiz M, Lafuente-Sanchis A, Cuevas JM, Zuniga A. Mutational prevalence of BRCA1 and BRCA2 genes in patients with breast and ovarian cancer treated in the health area of La Ribera (Comunidad Valenciana, Spain). *Revista Espanola de Patologia*. 2016;49(4):214-218. |
| Sun J, Meng H, Yao L, Lv M, Bai J, Zhang J, et al. Germline mutations in cancer susceptibility genes in a large series of unselected breast cancer patients. *Clin Cancer Res*. 2017;23(20):6113-6119. |

# Appendix 4: Risk of bias within studies reporting data on prevalence (using Joanna Briggs Institute checklist)

The Joanna Briggs tool will be used for studies that present prevalence data only.

Answers: Yes, No, Unclear or Not/Applicable

**1. Was the sample representative of the target population?**

This question relies upon knowledge of the broader characteristics of the population of interest. If the study is of women or men with breast cancer, knowledge of at least the characteristics, demographics and medical history is needed. The term “target population” should not be taken to infer every individual from everywhere or with similar disease or exposure characteristics. Instead, give consideration to specific population characteristics in the study, including age range, gender, morbidities, medications, and other potentially influential factors. For example, a sample may not be representative of the target population if a certain group has been used (such as those working for one organization, or one profession) and the results then inferred to the target population (ie, working adults).

**2. Were study participants recruited in an appropriate way?**

Recruitment is the calling or advertising strategy for gaining interest in the study and is not the same as sampling. Studies may report random sampling from a population, and the methods section should report how sampling was performed. What sources of data were study participants recruited from? Was the sampling frame appropriate? For example, census data are a good example of appropriate recruitment, as a good census will identify everybody. Was everybody included who should have been included? Were any groups of persons excluded? Was the whole population of interest surveyed? If not, was random sampling from a defined subset of the population employed? Was stratified random sampling with eligibility criteria used to ensure the sample was representative of the population that the researchers were generalizing to?

**3. Was the sample size adequate?**

An adequate sample size is important to ensure good precision of the final estimate. Ideally we are looking for evidence that the authors conducted a sample size calculation to determine an adequate sample size. This will estimate how many subjects are needed to produce a reliable estimate of the measure(s) of interest. For conditions with a low prevalence, a larger sample size is needed. Also consider sample sizes for subgroup (or characteristics) analyses, and whether these are appropriate. Sometimes, the study will be large enough (as in large national surveys) whereby a sample size calculation is not required. In these cases, sample size can be considered adequate.

When there is no sample size calculation and it is not a large national survey, the reviewers may consider conducting their own sample size analysis using the following formula:

N = Z2P(1-P)

d2

Where:

• N = sample size

• Z = Z statistic for a level of confidence

• P = expected prevalence or proportion (in proportion of one; if 20%, *P*=0.2)

• d = precision (in proportion of one; if 5%, d=0.05)

**4. Were the study subjects and setting described in detail?**

Certain diseases or conditions vary in prevalence across different geographic regions and populations (eg, women vs. men, sociodemographic variables between countries). Has the study sample been described in sufficient detail so that other researchers can determine if it is comparable to the population of interest to them?

**5. Is the data analysis conducted with sufficient coverage of the identified sample?**

A large number of dropouts, refusals or “not founds” among selected subjects may diminish a study’s validity, as can low response rates for survey studies.

- Did the authors describe the reasons for nonresponse and compare persons in the study to those not in the study, particularly with regard to their socio-demographic characteristics?

- Could the not-responders have led to an underestimate of prevalence of the disease or condition under investigation?

- If reasons for nonresponse appear to be unrelated to the outcome measured and the characteristics of nonresponders are comparable to those in the study, the researchers may be able to justify a more modest response rate.

- Did the means of assessment or measurement negatively affect the response rate (measurement should be easily accessible, conveniently timed for participants, acceptable in length and suitable in content).

**6. Were objective, standard criteria used for measurement of the condition?**

Here we are looking for measurement or classification bias. Many health problems are not easily diagnosed or defined and some measures may not be capable of including or excluding appropriate levels or stages of the health problem. If the outcomes were assessed based on existing definitions or diagnostic criteria, then the answer to this question is likely to be yes. If the outcomes were assessed using observer-reported or self-reported scales, the risk of over- or under-reporting is increased, and objectivity is compromised. Importantly, determine if the measurement tools used were validated instruments as this has a significant impact on outcome assessment validity.

**7. Was the condition measured reliably?**

Considerable judgment is required to determine the presence of some health outcomes. Having established the objectivity of the outcome measurement instrument (see item 6 of this scale), it is important to establish how the measurement was conducted. Were those involved in collecting data trained or educated in the use of the instrument/s? If there was more than one data collector, were they similar in terms of level of education, clinical or research experience, or level of responsibility in the piece of research being appraised?

- Has the researcher justified the methods chosen?

- Has the researcher made the methods explicit? (For interview method, how were interviews conducted?)

**8. Was there appropriate statistical analysis?**

As with any consideration of statistical analysis, consideration should be given to whether there was a more appropriate alternate statistical method that could have been used. The methods section should be detailed enough for reviewers to identify the analytical technique used and how specific variables were measured. Additionally, it is also important to assess the appropriateness of the analytical strategy in terms of the assumptions associated with the approach as differing methods of analysis are based on differing assumptions about the data and how they will respond. Prevalence rates found in studies only provide estimates of the true prevalence of a problem in the larger population. Since some subgroups are very small, 95% confidence intervals are usually given.

**9. Are all important confounding factors/ subgroups/differences identified and accounted** **for?**

Incidence and prevalence studies often draw or report findings regarding the differences between groups. It is important that authors of these studies identify all important confounding factors, subgroups and differences and account for these.

**10. Were subpopulations identified using objective criteria?**

Objective criteria should also be used where possible to identify subgroups (refer to question 6).

**Note:** Copyright © 2015. Joanna Briggs Institute. Reproduced from Munn Z, Moola S, Lisy K, Riitano D, Tufanaru C. Methodological guidance for systematic reviews of observational epidemiological studies reporting prevalence and incidence data*. Int J Evid Based Healthc*. 2015;13(3):147–153.71

**References**

1. Bayraktar S, Gutierrez-Barrera AM, Lin H, et al. Outcome of metastatic breast cancer in selected women with or without deleterious BRCA mutations. *Clin Exp Metastasis.* 2013;30(5):631-642.

2. Beck A, Yuan H, Imperiale-Hagerman P, et al. Adhering to the guidelines: rates of BRCA mutation using NCCN genetic testing criteria. *Ann Surg Oncol.* 2017;24(2):257048.

3. Biskupiak JE, Telford C, Yoo M, et al. Evaluation of women with BRCA mutations and breast cancer tested at an NCI designated comprehensive cancer center: A cost of illness estimation. *Cancer Res.* 2017;77(4 Suppl):Abstract P3-12-03.

4. Buys SS, Sandbach JF, Gammon A, et al. A study of over 35,000 women with breast cancer tested with a 25-gene panel of hereditary cancer genes. *Cancer.* 2017;123(10):1721-1730.

5. Couch FJ, Hart SN, Sharma P, et al. Inherited mutations in 17 breast cancer susceptibility genes among a large triple-negative breast cancer cohort unselected for family history of breast cancer. *J Clin Oncol.* 2015;33(4):304-311.

6. De La Cruz J, Andre F, Harrell RK, et al. Tissue-based predictors of germ-line BRCA1 mutations: Implications for triaging of genetic testing. *Hum Pathol.* 2012;43(11):1932-1939.

7. Ellsworth RE, Rummel S, Varner E, Shriver CD. Evaluation of BRCA1 mutations in patients with triple negative breast cancer. *Cancer Res.* 2012;72(8 Suppl):Abstract 68.

8. Emborgo T, Muse KI, Bednar E, et al. Universal BRCA testing and family outreach for women with triple negative breast cancer. *Cancer Res.* 2016;76(4):Abstract P2-09-08.

9. Greenup R, Buchanan A, Lorizio W, et al. Prevalence of BRCA mutations among women with triple-negative breast cancer (TNBC) in a genetic counseling cohort. *Ann Surg Oncol.* 2013;20(10):3254-3258.

10. Guerra YC, Sand S, Correa MC, et al. Genetic, clinical and pathological characteristics of BRCA-associated breast cancer (BC) in hispanic patients in the United States (US) and Latin America (LatAm). *J Clin Oncol.* 2017;35(15 suppl):1539.

11. Hartman AR, Kaldate RR, Sailer LM, et al. Prevalence of BRCA mutations in an unselected population of triple-negative breast cancer. *Cancer.* 2012;118(11):2787-2795.

12. Keung YK, Hu A, Yeung A, Chan A, Hu E. Higher prevalence of BRCA2 mutations among Chinese breast cancer patients in a community oncology clinic. *J Clin Oncol.* 2012;15(Suppl):12017.

13. Pal T, Bonner D, Kim J, et al. BRCA mutations and factors associated with surgery type in a registry-based sample of young black women with invasive breast cancer. *Curr Oncol.* 2012;19(2):e99.

14. Pal T, Bonner D, Kim J, et al. Early onset breast cancer in a registry-based sample of African-American women: BRCA mutation prevalence, and other personal and system-level clinical characteristics. *Breast J.* 2013;19(2):189-192.

15. Pal T, Bonner D, Cragun D, et al. Proportion of BRCA mutation frequency in young black women with breast cancer. *J Clin Oncol.* 2014;15(Suppl):1506.

16. Pal T, Bonner D, Cragun D, et al. BRCA sequencing and large rearrangement testing in young Black women with breast cancer. *J Community Genet.* 2014;5(2):157-165.

17. Pal T, Bonner D, Cragun D, et al. A high frequency of BRCA mutations in young black women with breast cancer residing in Florida. *Cancer.* 2015;121(23):4173-4180.

18. Petersen L, Aubry S, Burgess K, Rao R, Kopkash K, Madrigrano A. Are triple negative breast cancer patients screened for BRCA mutations according to NCCN guidelines? *Ann Surg Oncol.* 2016;23(1 SUPPL. 1):S67-S68.

19. Rummel S, Varner E, Shriver CD, Ellsworth RE. Evaluation of BRCA1 mutations in an unselected patient population with triple-negative breast cancer. *Breast Cancer Res Treat.* 2013;137(1):119-125.

20. Rummel SK, Lovejoy L, Shriver CD, Ellsworth RE. Contribution of germline mutations in cancer predisposition genes to tumor etiology in young women diagnosed with invasive breast cancer. *Breast Cancer Res Treat.* 2017;164(3):593-601.

21. Sanford RA, Song J, Gutierrez-Barrera AM, et al. Incidence of germline BRCA mutation in patients with ER-low positive/PR negative/HER-2 neu negative tumors. *J Clin Oncol.* 2014;26(Suppl):2.

22. Sanford RA, Song J, Gutierrez-Barrera AM, et al. High incidence of germline BRCA mutation in patients with ER low-positive/PR low-positive/HER-2 neu negative tumors. *Cancer.* 2015;121(19):3422-3427.

23. Sharma P, Klemp JR, Kimler BF, et al. Germline BRCA mutation evaluation in a prospective triple-negative breast cancer registry: implications for hereditary breast and/or ovarian cancer syndrome testing. *Breast Cancer Res Treat.* 2014;145(3):707-714.

24. Skandan SP. 5 year overall survival of triple negative breast cancer: a single institution experience. *J Clin Oncol.* 2016;34(15 Suppl):e12580.

25. Stadler ZK, Salo-Mullen E, Patil SM, et al. Prevalence of BRCA1 and BRCA2 mutations in Ashkenazi Jewish families with breast and pancreatic cancer. *Cancer.* 2012;118(2):493-499.

26. Susswein LR, Marshall ML, Nusbaum R, et al. Pathogenic and likely pathogenic variant prevalence among the first 10,000 patients referred for next-generation cancer panel testing. *Genet Med.* 2016;18(8):823-832.

27. Tung N, Battelli C, Allen B, et al. Frequency of mutations in individuals with breast cancer referred for BRCA1 and BRCA2 testing using next-generation sequencing with a 25-gene panel. *Cancer.* 2015;121(1):25-33.

28. Tung N, Lin NU, Kidd J, et al. Frequency of germline mutations in 25 cancer susceptibility genes in a sequential series of patients with breast cancer. *J Clin Oncol.* 2016;34(13):1460-1468.

29. Weitzel JN, Clague J, Martir-Negron A, et al. Prevalence and type of BRCA mutations in Hispanics undergoing genetic cancer risk assessment in the southwestern United States: a report from the Clinical Cancer Genetics Community Research Network.[Erratum appears in J Clin Oncol. 2013 May 1;31(13):1702]. *J Clin Oncol.* 2013;31(2):210-216.

30. Welinsky S, Becker AE, Aronson A, Hernandez YG, Soper E, Lucas AL. No increase in prevalence of pancreatic cysts in BRCA1 or BRCA2 mutation carriers with breast cancer. *Gastroenterology.* 2016;150(4 Suppl 1):S233.

31. Vidula N, Isakoff SJ, Niemierko A, et al. Somatic BRCA mutation detection by circulating tumor DNA analysis in patients with metastatic breast cancer: incidence and association with tumor genotyping results, germline BRCA mutation status, and clinical outcomes. *Cancer Res.* 2018;78(4 Suppl):Abstract PD1-13.

32. Ross JL, Woodson AH, Gutierrez Barrera AM, Litton JK, Arun B. Multi-gene panel testing results in patients with multiple breast cancer primaries. *Cancer Res.* 2018;78(4 Suppl):Abstract PD1-10.

33. Ellsworth RE, Lovejoy LA, Shriver C, D. Assessment of the hereditary component in 94 cancer predisposition genes to triple negative breast cancer. *Cancer Res*, 2018;78(4 Suppl):Abstract P4-07-01.

34. Eccles DM, Li N, Handwerker R, et al. Genetic testing in a cohort of young patients with HER2-amplified breast cancer. *Ann Oncol.* 2016;27(3):467-473.

35. Eccles DM, Copson ER, Maishman T, et al. Does BRCA status affect outcome in young breast cancer patients? Results from the prospective study of outcomes in sporadic and hereditary breast cancer (POSH). *Cancer Res.* 2017;77(4 Suppl):Abstract S2-03.

36. Rahman N, Turnbull A, George A, Strydom A, Kemp Z. Using cancer status is better, simpler and more cost-effective than family history in determining breast cancer genetic testing eligibility. Presented at ASHG; 2017; October 17-21, 2017; Orlando: FL. https://ep70.eventpilotadmin.com/web/page.php?page=IntHtml&project=ASHG17&id=170121508. Accessed February 15, 2019.

37. Robertson L, Hanson H, Seal S, et al. BRCA1 testing should be offered to individuals with triple-negative breast cancer diagnosed below 50 years. *Br J Cancer.* 2012;106(6):1234-1238.

38. Andres R, Pajares I, Balmana J, et al. Association of BRCA1 germline mutations in young onset triple-negative breast cancer (TNBC). *Clin Transl Oncol.* 2014;16(3):280-284.

39. de Juan Jimenez I, Esteban Cardenosa E, Palanca Suela S, et al. Low prevalence of BRCA1 and BRCA2 mutations in the sporadic breast cancer of Spanish population. *Fam Cancer.* 2012;11(1):49-56.

40. Gonzalez-Rivera M, Lobo M, Lopez-Tarruella S, et al. Frequency of germline DNA genetic findings in an unselected prospective cohort of triple-negative breast cancer patients participating in a platinum-based neoadjuvant chemotherapy trial.]. *Breast Cancer Res Treat.* 2016;156(3):507-515. Erratum in: *Breast Cancer Res Treat*. 2017;165 (2):471.

41. Zugazagoitia J, Perez-Segura P, Manzano A, et al. Limited family structure and triple-negative breast cancer (TNBC) subtype as predictors of BRCA mutations in a genetic counseling cohort of early-onset sporadic breast cancers. *Breast Cancer Res Treat.* 2014;148(2):415-421.

42. Duffy J, Greening S, Warwick L, Tucker K, Creighton B. An Australian perspective of genetic testing in breast cancers diagnosed under age 31. *Curr Oncol.* 2012;19(2):e106.

43. Wong-Brown MW, Meldrum CJ, Carpenter JE, et al. Prevalence of BRCA1 and BRCA2 germline mutations in patients with triple-negative breast cancer. *Breast Cancer Res Treat* 2015;150(1):71-80.

44. Ghadirian P, Robidoux A, Nassif E, et al. Screening for BRCA1 and BRCA2 mutations among French-Canadian breast cancer cases attending an outpatient clinic in Montreal. *Clin Genet.* 2014;85(1):31-35.

45. Vanstone M, Chow W, Lester L, Ainsworth P, Nisker J, Brackstone M. Recognizing BRCA gene mutation risk subsequent to breast cancer diagnosis in southwestern Ontario. *Can Fam Physician.* 2012;58(5):e258-266.

46. Meynard G, Villanueva C, Thiery-Vuillemin A, et al. 284P Real-life study of BRCA genetic screening in metastatic breast cancer. *Ann Oncol.* 2017;28(suppl_5):mdx365.047.

47. Tunon De Lara C, Bonnet F, Debled M, et al. Rapid germline BRCA screening for locally advanced breast cancer changes surgical procedure after neoadjuvant chemotherapy. *Cancer Res.* 2017;77(4 Suppl):Abstract P5-16-23.

48. Kast K, Rhiem K, Wappenschmidt B, et al. Prevalence of BRCA1/2 germline mutations in 21 401 families with breast and ovarian cancer. *J Medl Genet.* 2016;53(7):465-471.

49. Rhiem K, Engel C, Engel J, et al. BRCAI/2 mutation prevalence in triple-negative breast cancer patients without family history of breast and ovarian cancer. *J Clin Oncol.* 2016;34(15 Suppl):1090.

50. Fasching PA, Hu C, Hart SN, et al. Cancer predisposition genes in metastatic breast cancer – association with metastatic pattern, prognosis, patient and tumor characteristics. *Cancer Res*, 2018;78(4 Suppl):Abstract PD1-02.

51. Asleh-Aburaya K, Fried G. Clinical and molecular characteristics of triple-negative breast cancer patients in Northern Israel: single center experience. *Springerplus.* 2015;4:132.

52. Dagan E, Gershoni-Baruch R, Kurolap A, Fried G. Early onset breast cancer in Ashkenazi women carriers of founder BRCA1/2 mutations: beyond 10 years of follow-up. *Eur J Cancer Care (Engl).* 2017;26(6).

53. Lolas Hamameh S, Renbaum P, Kamal L, et al. Genomic analysis of inherited breast cancer among Palestinian women: genetic heterogeneity and a founder mutation in TP53. *Int J Cancer.* 2017;141(4):750-756.

54. Loi M, Olmetto E, Desideri I, et al. BRCA1/2 mutation in breast cancer: biological aspects, patterns of care and impact on outcome in a monoinstitutional cohort. *Eur J Cancer.* 2017;72(Supplement 1):S19.

55. Musolino A, Bella MA, Michiara M, et al. Brca status, molecular profile and clinical variables in primary bilateral breast cancers: a population-based cancer registry study. *Ann Oncol.* 2012;23:ix175-ix176.

56. Kitagawa H, Yagata H, Yoshida A, Nakano E, Yoshino M, Yamauchi H. The prevalence of BRCA mutations among patients with triple-negative breast cancer. *Curr Oncol.* 2014;21(2):e388.

57. Cherdyntseva NV, Pisareva LF, Ivanova AA, et al. [Ethnic aspects of hereditary breast cancer in the region of Siberia]. *Vestn Ross Akad Med Nauk.* 2014;(11-12):72-79.

58. Polonikov A, Aristova I, Leitanthem W, et al. Prevalence of BRCA1 and BRCA2 mutations in breast cancer patients in Russia. *Ann Acad Med Singapore.* 2015;44(10 Suppl 1):S324.

59. Palomba G, Budroni M, Olmeo N, et al. Triple-negative breast cancer frequency and type of BRCA mutation: clues from Sardinia. *Oncol Lett.* 2014;7(4):948-952.

60. Han SA, Kim SW, Kang E, et al. The prevalence of BRCA mutations among familial breast cancer patients in Korea: results of the Korean Hereditary Breast Cancer study. *Fam Cancer.* 2013;12(1):75-81.

61. Jung J, Kang E, Gwak JM, et al. Association between basal-like phenotype and BRCA1/2 germline mutations in Korean breast cancer patients. *Curr Oncol.* 2016;23(5):298-303.

62. Kang E, Seong MW, Park SK, et al. The prevalence and spectrum of BRCA1 and BRCA2 mutations in Korean population: recent update of the Korean Hereditary Breast Cancer (KOHBRA) study. *Breast Cancer Res Treat.* 2015;151(1):157-168.

63. Kim H, Cho DY, Choi DH, et al. Characteristics and spectrum of BRCA1 and BRCA2 mutations in 3,922 Korean patients with breast and ovarian cancer. *Breast Cancer Res Treat.* 2012;134(3):1315-1326.

64. Lee AS, Kang EY, Baek H, Chae S, Kim EK, Kim SW. Evaluation of BRCA1/2 mutation prevalence in Korean women with triple-negative breast cancer. *Ann Oncol.* 2015;26(Suppl 9):ix16.

65. Noh JM, Han BK, Choi DH, et al. Association between BRCA mutation status, pathological findings, and magnetic resonance imaging features in patients with breast cancer at risk for the mutation. *J Breast Cancer.* 2013;16(3):308-314.

66. Park B, Sohn JY, Yoon KA, et al. Characteristics of BRCA1/2 mutations carriers including large genomic rearrangements in high risk breast cancer patients. *Breast Cancer Res Treat.* 2017;163(1):139-150.

67. Seong MW, Kim KH, Chung IY, et al. A multi-institutional study on the association between BRCA1/BRCA2 mutational status and triple-negative breast cancer in familial breast cancer patients. *Breast Cancer Res Treat.* 2014;146(1):63-69.

68. Sohn JY, Park B, Yoon KA, et al. Prevalence of BRCA1 and BRCA2 small mutation and large genomic rearrangements in breast cancer patients visiting a genetic counseling clinic. *Cancer Res.* 2016;76(14):Abstract 3474.

69. Son BH, Ahn SH, Kim SW, et al. Prevalence of BRCA1 and BRCA2 mutations in non-familial breast cancer patients with high risks in Korea: the Korean Hereditary Breast Cancer (KOHBRA) Study. *Breast Cancer Res Treat.* 2012;133(3):1143-1152.

70. Yoon KA, Park B, Lee BI, Yang MJ, Kong SY, Lee ES. Clinically significant unclassified variants in BRCA1 and BRCA2 genes among Korean breast cancer patients. *Cancer Res Treat.* 2017;49(3):627-634.

71. Munn Z, Moola S, Lisy K, Riitano D, Tufanaru C. Methodological guidance for systematic reviews of observational epidemiological studies reporting prevalence and incidence data. *Int* *J Evid Based Healthc*. 2015;13(3):147–153. doi: 10.1097/XEB.0000000000000054.
